# Supplementary material for: Cluster-based metal–organic frameworks as sensitive and selective luminescent probes for sensing nitro explosives
Source: Royal Society of Chemistry journal article supplement (doi:10.1039/c5nj01237f), 2015-01-01
Supplement: c5nj01237f1.pdf [file c5nj01237f1.pdf]

## Supporting information

### **Cluster-based metal-organic framework as sensitive and selective luminescent probes for sensing nitro explosives**

**Xiao-Li Hu, Chao Qin,\* Xin-Long Wan, Kui-Zhan Shao and Zhong-Min Su\***

Institute of Functional Material Chemistry; Faculty of Chemistry, Northeast Normal University, Changchun, 130024, People's Republic of China; E-mail: qinc703@nenu.edu.cn; zmsu@nenu.edu.cn.

## **S1. Materials and measurements**

All chemical materials were purchased from commercial sources and used without further purification. The FT-IR spectra were recorded from KBr pellets in the range 4000–400  $\text{cm}^{-1}$  on a Mattson Alpha-Centauri spectrometer. XRPD patterns were recorded on a Siemens D5005 diffractometer with Cu  $K\alpha$  ( $\lambda = 1.5418 \text{ \AA}$ ) radiation in the range of 3–60° at a rate of 5°/min. The UV-Vis absorption spectra were examined on a Shimadzu UV-2550 spectrophotometer in the wavelength range of 200–800 nm. The C, H, and N elemental analyses were conducted on a Perkin-Elmer 2400CHN elemental analyzer. TG curves were performed on a Perkin-Elmer TG-7 analyzer heated from room temperature to 1000 °C at a ramp rate of 5 °C/min under nitrogen. The photoluminescence spectra were measured on a Perkin-Elmer FLS-920 Edinburgh Fluorescence Spectrometer.

## **S2. X-ray crystallography**

Single-crystal X-ray diffraction data for compound **1** were recorded by using a Bruker Apex CCD diffractometer with graphite-monochromated Mo- $K\alpha$  radiation ( $\lambda = 0.71069 \text{ \AA}$ ) at 293 K. Absorption corrections were applied by using a multi-scan technique. All the structures were solved by Direct Method of SHELXS-97 and refined by full-matrix least-squares techniques using the SHELXL-97 program within WINGX. Non-hydrogen atoms were refined with anisotropic temperature parameters.

The detailed crystallographic data and structure refinement parameters for compound **1** are summarized in Table S1.

## **S3. The solvent sensing experiment**

The solvent sensing experiment has been performed as follows: finely ground samples of **1a** was immersed in different organic solvents (3 mL), treated by ultrasonication for 30 minutes, and then aged to form stable emulsions before fluorescence was measured.

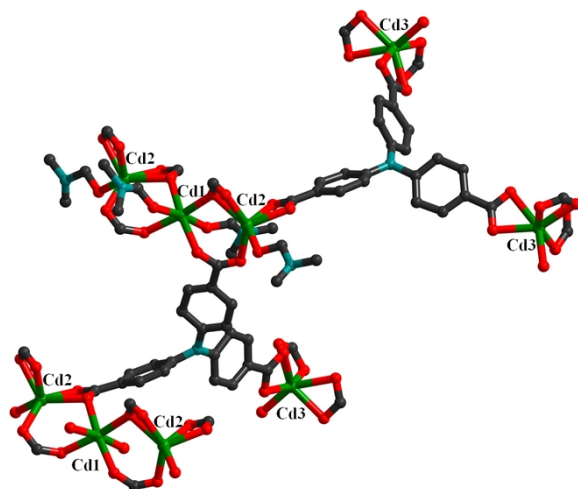

**Fig. S1** The coordination environment of the Cd(II) center and the coordination mode of H<sub>3</sub>NTB in **1**. The hydrogen atoms are omitted for clarity (Zn, pink; N, blue; C, gray; O, red).

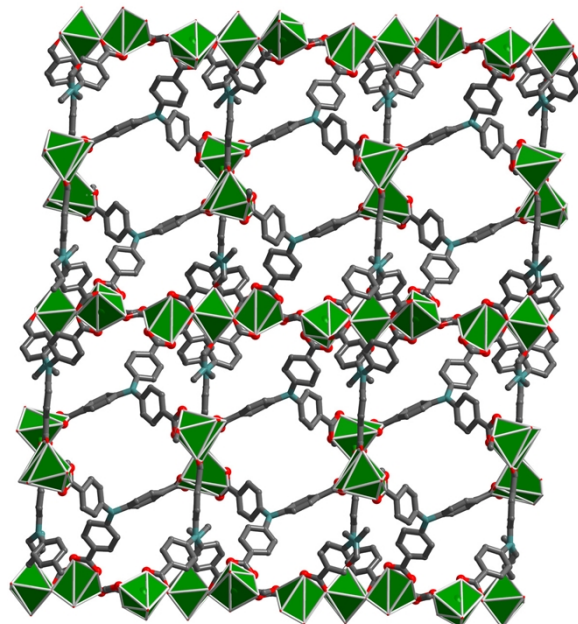

**Fig. S2** View of the 3D framework of **1** along the *b* axis.

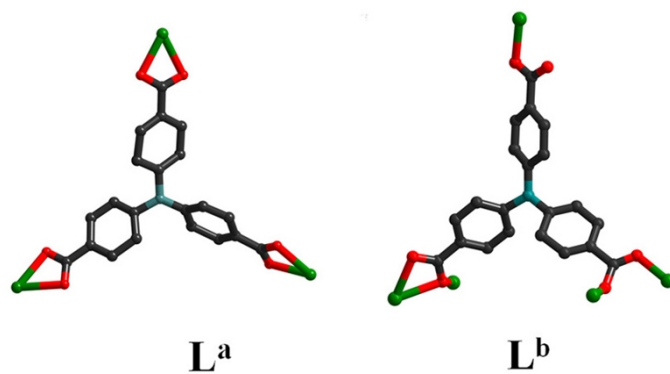

**Fig. S3** Coordination Modes of the NTB Ligands in **1** (L<sup>a</sup> and L<sup>b</sup>)

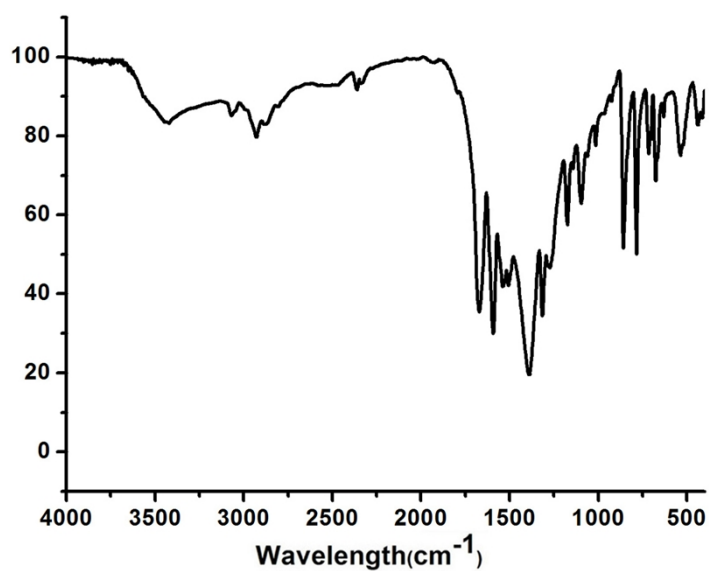

**Fig. S4** FT-IR spectra of **1**.

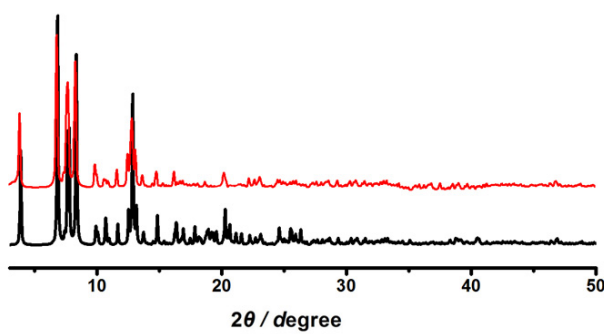

**Fig. S5** X-ray powder diffraction patterns of **1**: simulated (black) and as-synthesized

(red).

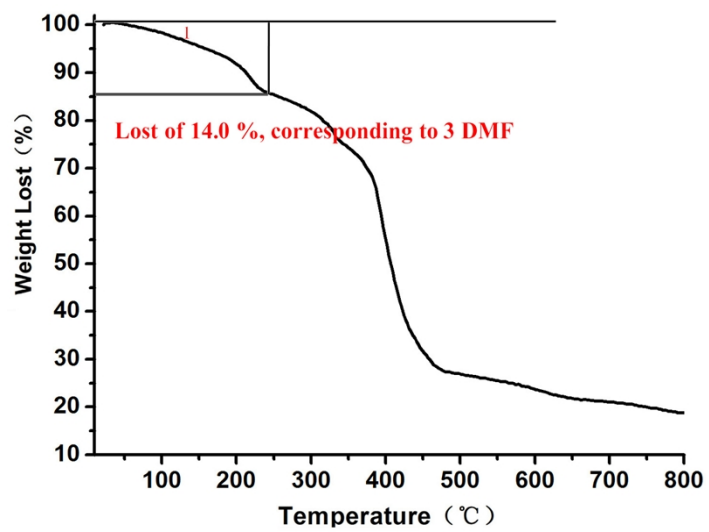

**Fig. S6** TG curve of MOF 1

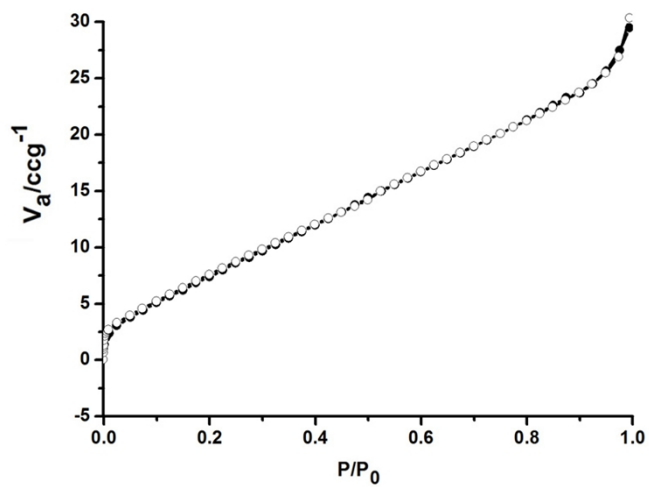

**Fig. S7**  $\text{N}_2$  sorption isotherms for 1a at 77K.

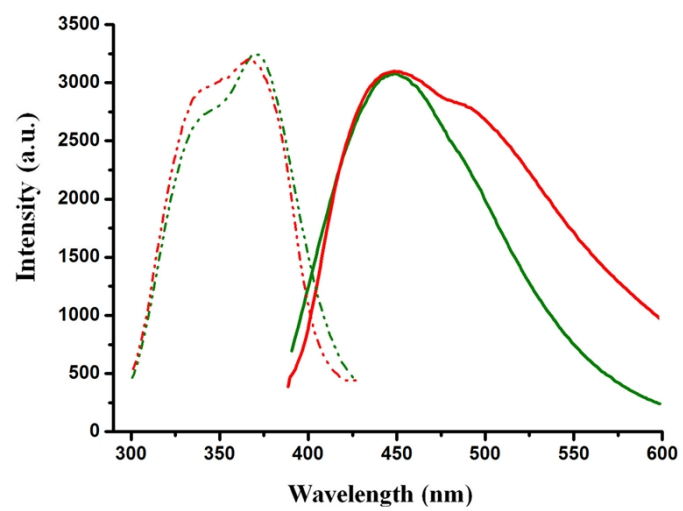

**Fig. S8** Excitation and Emission spectra of the NTB ligand (red) and **1** (green).

**Table S1** Crystal data and structure refinements for compound **1**.

---

| <b>1</b>                                                         |                                                                                    |
|------------------------------------------------------------------|------------------------------------------------------------------------------------|
| Formula                                                          | C <sub>63</sub> H <sub>73</sub> N <sub>9</sub> O <sub>19</sub> NaCd <sub>2.5</sub> |
| Formula weight                                                   | 1564.3                                                                             |
| Crystal system                                                   | monoclinic                                                                         |
| Space group                                                      | <i>P2/c</i>                                                                        |
| <i>a</i> (Å)                                                     | 25.450(5)                                                                          |
| <i>b</i> (Å)                                                     | 11.928(5)                                                                          |
| <i>c</i> (Å)                                                     | 25.835(5)                                                                          |
| <i>α</i> (°)                                                     | 90                                                                                 |
| <i>β</i> (°)                                                     | 116.777(5)                                                                         |
| <i>γ</i> (°)                                                     | 90                                                                                 |
| <i>V</i> (Å <sup>3</sup> )                                       | 7002(4)                                                                            |
| <i>Z</i>                                                         | 4                                                                                  |
| <i>D</i> <sub>calcd.</sub> [gcm <sup>-3</sup> ]                  | 1.484                                                                              |
| <i>F</i> (000)                                                   | 3188                                                                               |
| Reflections collected                                            | 39241/12312                                                                        |
| <i>R</i> (int)                                                   | 0.1824                                                                             |
| Goodness-of-fit on <i>F</i> <sup>2</sup>                         | 1.006                                                                              |
| <i>R</i> <sub>1</sub> <sup>a</sup> [ <i>I</i> > 2σ ( <i>I</i> )] | 0.0979                                                                             |
| <i>wR</i> <sub>2</sub> <sup>b</sup>                              | 0.2440                                                                             |

---

<sup>a</sup>*R*<sub>1</sub> =  $\sum ||F_o| - |F_c|| / \sum |F_o|$ , <sup>b</sup> *wR*<sub>2</sub> =  $[\sum w(|F_o|^2 - |F_c|^2)^2 / \sum w(F_o^2)^2]^{1/2}$

---

**Table S2** Selected bond lengths [ $\text{\AA}$ ] and angles [ $^\circ$ ] for **1**

|                      |           |                      |           |
|----------------------|-----------|----------------------|-----------|
| Cd(1)-O(6)#1         | 2.283(11) | Cd(1)-O(6)           | 2.283(11) |
| Cd(1)-O(1)#2         | 2.301(10) | Cd(1)-O(1)#3         | 2.301(10) |
| Cd(1)-O(01)          | 2.302(8)  | Cd(1)-O(01)#1        | 2.302(8)  |
| Cd(2)-O(5)           | 2.199(12) | Cd(2)-O(02)          | 2.300(8)  |
| Cd(2)-O(3)           | 2.301(12) | Cd(2)-O(2)#3         | 2.320(11) |
| Cd(2)-O(4)           | 2.434(13) | Cd(2)-O(1)#3         | 2.459(10) |
| Cd(3)-O(7)#4         | 2.263(11) | Cd(3)-O(03)          | 2.299(8)  |
| Cd(3)-O(11)          | 2.311(11) | Cd(3)-O(10)#5        | 2.375(12) |
| Cd(3)-O(12)          | 2.379(11) | Cd(3)-O(9)#5         | 2.384(12) |
| O(6)#1-Cd(1)-O(6)    | 98.5(7)   | O(6)#1-Cd(1)-O(1)#2  | 84.4(4)   |
| O(6)-Cd(1)-O(1)#2    | 169.6(4)  | O(6)#1-Cd(1)-O(01)   | 92.1(5)   |
| O(6)-Cd(1)-O(01)     | 83.6(4)   | O(1)#2-Cd(1)-O(01)   | 86.3(4)   |
| O(1)#3-Cd(1)-O(01)   | 98.2(4)   | O(6)#1-Cd(1)-O(01)#1 | 83.6(4)   |
| O(6)-Cd(1)-O(01)#1   | 92.1(5)   | O(1)#2-Cd(1)-O(01)#1 | 98.2(4)   |
| O(1)#3-Cd(1)-O(01)#1 | 86.3(4)   | O(01)-Cd(1)-O(01)#1  | 173.4(7)  |
| O(5)-Cd(2)-O(02)     | 88.7(5)   | O(5)-Cd(2)-O(3)      | 119.7(5)  |
| O(02)-Cd(2)-O(3)     | 83.8(5)   | O(5)-Cd(2)-O(2)#3    | 141.3(5)  |
| O(02)-Cd(2)-O(2)#3   | 93.2(5)   | O(3)-Cd(2)-O(2)#3    | 98.9(5)   |
| O(5)-Cd(2)-O(4)      | 92.4(5)   | O(02)-Cd(2)-O(4)     | 133.6(5)  |
| O(3)-Cd(2)-O(4)      | 55.9(4)   | O(2)#3-Cd(2)-O(4)    | 113.2(5)  |
| O(5)-Cd(2)-O(1)#3    | 104.1(4)  | O(02)-Cd(2)-O(1)#3   | 142.7(4)  |
| O(3)-Cd(2)-O(1)#3    | 117.3(5)  | O(2)#3-Cd(2)-O(1)#3  | 55.2(4)   |
| O(4)-Cd(2)-O(1)#3    | 81.6(4)   | O(7)#4-Cd(3)-O(03)   | 85.8(5)   |
| O(7)#4-Cd(3)-O(11)   | 104.7(5)  | O(03)-Cd(3)-O(11)    | 94.1(5)   |
| O(7)#4-Cd(3)-O(10)#5 | 105.4(5)  | O(03)-Cd(3)-O(10)#5  | 100.8(5)  |
| O(11)-Cd(3)-O(10)#5  | 147.1(4)  | O(7)#4-Cd(3)-O(12)   | 107.1(5)  |
| O(03)-Cd(3)-O(12)    | 149.1(4)  | O(11)-Cd(3)-O(12)    | 55.9(4)   |
| O(10)#5-Cd(3)-O(12)  | 102.4(4)  | O(7)#4-Cd(3)-O(9)#5  | 156.7(5)  |
| O(03)-Cd(3)-O(9)#5   | 86.5(5)   | O(11)-Cd(3)-O(9)#5   | 97.7(4)   |
| O(10)#5-Cd(3)-O(9)#5 | 54.7(4)   | O(12)-Cd(3)-O(9)#5   | 90.5(5)   |
